# Supplementary material for: Squaraine-linked zwitterionic COF modified LLZTO nanoparticles for high performance polymer composite electrolytes in Li–S batteries
Source: Royal Society of Chemistry journal article supplement (doi:10.1039/d3nr01942j), 2023-01-01
Supplement: d3nr01942j1.pdf [file d3nr01942j1.pdf]

Supporting information for

**A squaraine-linked zwitterionic COF modified LLZTO nanoparticles for high performance polymer composite electrolyte in Li-S battery**

Shuo Wang, Mengke Li, Gaojie Yan, Zhipeng Yang, Yuchao Guo, Xi Sun, Yue Wang,  
Yi Feng\*, Huili Ding\*, and Xiaojie Zhang\*

*Hebei Key Laboratory of Functional Polymers, Department of Polymer Materials and Engineering, Hebei University of Technology, Tianjin 300400, P. R. China*

Corresponding author:

\*Email: luckyii0512@hebut.edu.cn (Y. Feng)

\*Email: aleeding@hebut.edu.cn (H. Ding)

\*Email: zhangxj@hebut.edu.cn (X. Zhang)

***Decision on the mass ratio of raw materials for preparing LLZTO@HUT4 nanoparticles***

Ionic conductivity and transference number were measured for obtained PCEs with LLZTO@HUT4 nanoparticles synthesized via different mass ratios of raw materials. The total mass of squaric acid and melamine monomers was denoted as  $M_{SM}$ , and the mass of LLZTO powders was denoted as  $M_{LLZTO}$ . Nyquist plots and Chronoamperometric curves of PCEs with different mass ratios ( $M_{LLZTO}: M_{SM} = 3:1, 2:1, 1:1, 1:2$ ) were shown in **Fig. S4** and **S5**, it demonstrated that the LLZTO@HUT4/PEO electrolyte with  $M_{LLZTO}: M_{SM} = 2:1$  exhibited higher ionic conductivity ( $0.52 \text{ mS cm}^{-1}$ ) than other ratios. Moreover, the transference number of as-prepared electrolytes were calculated as presented in **Table S2**. when  $M_{LLZTO}: M_{SM} = 2:1$ , the electrolyte exhibited the highest transference number (0.51) at  $60 \text{ }^{\circ}\text{C}$  compared with other counterparts. Therefore, the mass ratio of  $M_{LLZTO}: M_{SM} = 2:1$  was applied in further experiments.

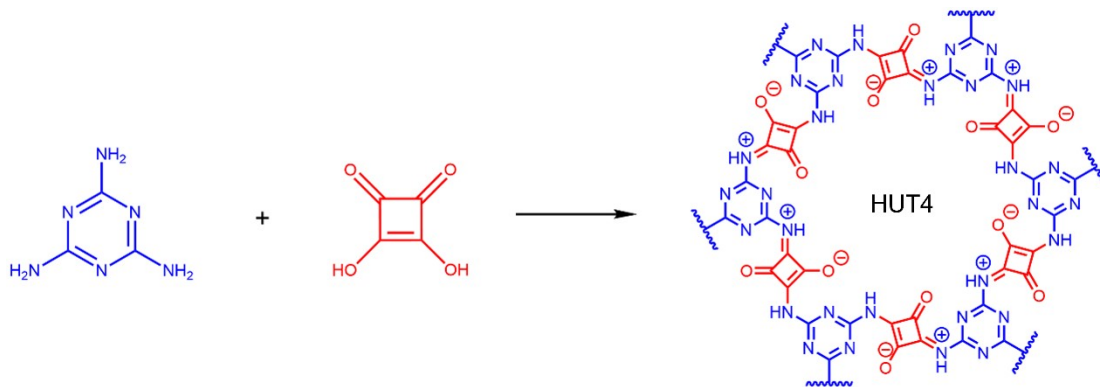

**Fig. S1.** The synthetic route of HUT4.

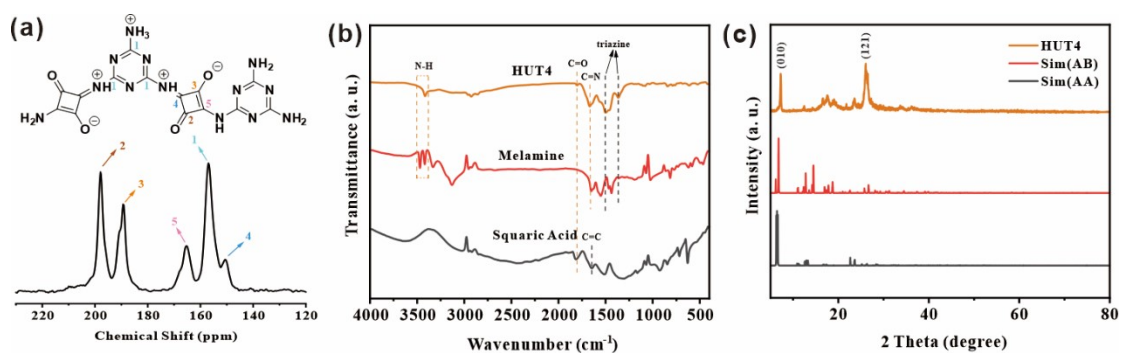

**Fig. S2.** (a) Solid-state  $^{13}\text{C}$  NMR of HUT4; (b) FTIR spectra of squaric acid, melamine and HUT4; (c) Experimental and simulated XRD patterns of HUT4.

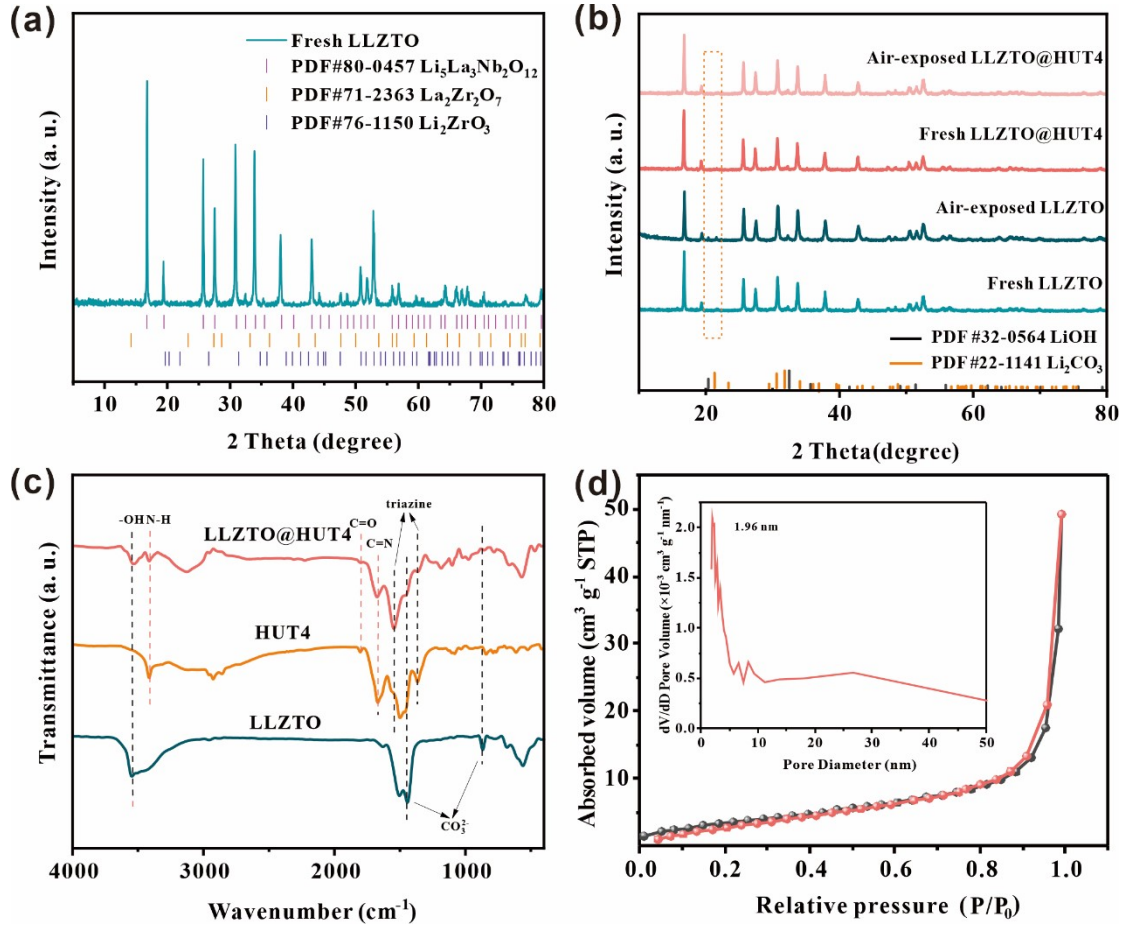

**Fig. S3.** (a) XRD patterns of fresh LLZTO and PDF of Cubic garnet (98.3%),  $\text{La}_2\text{Zr}_2\text{O}_7$  (1.7%),  $\text{Li}_2\text{ZrO}_3$  (0%), the relative content was obtained by fitting with Jade; (b) XRD patterns of fresh LLZTO, 2 days air-exposed LLZTO, fresh LLZTO@HUT4 and 30 days air-exposed LLZTO@HUT4; (c) FTIR spectra of LLZTO, HUT4 and LLZTO@HUT4; (d) Nitrogen isotherm adsorption and desorption curve of LLZTO@HUT4 (inset: Pore size distribution profiles of LLZTO@HUT4).

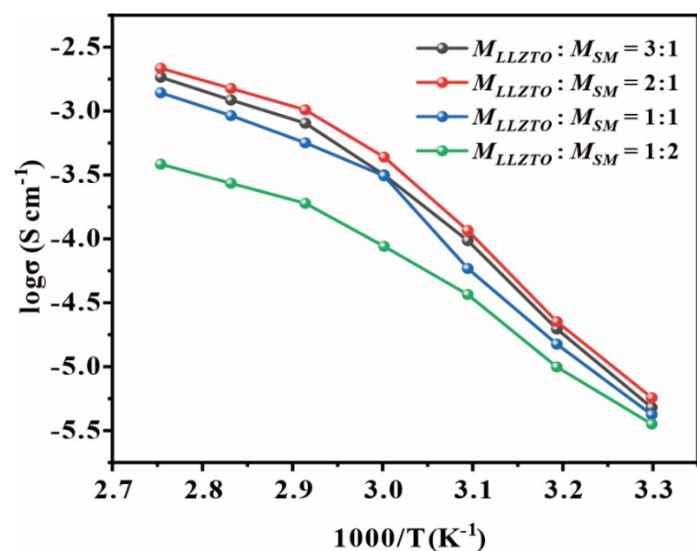

**Fig. S4.** Arrhenius plots of ionic conductivity for PCEs prepared with LLZTO@HUT4 nanoparticles in various  $M_{LLZTO}$  to  $M_{SM}$  ratios.

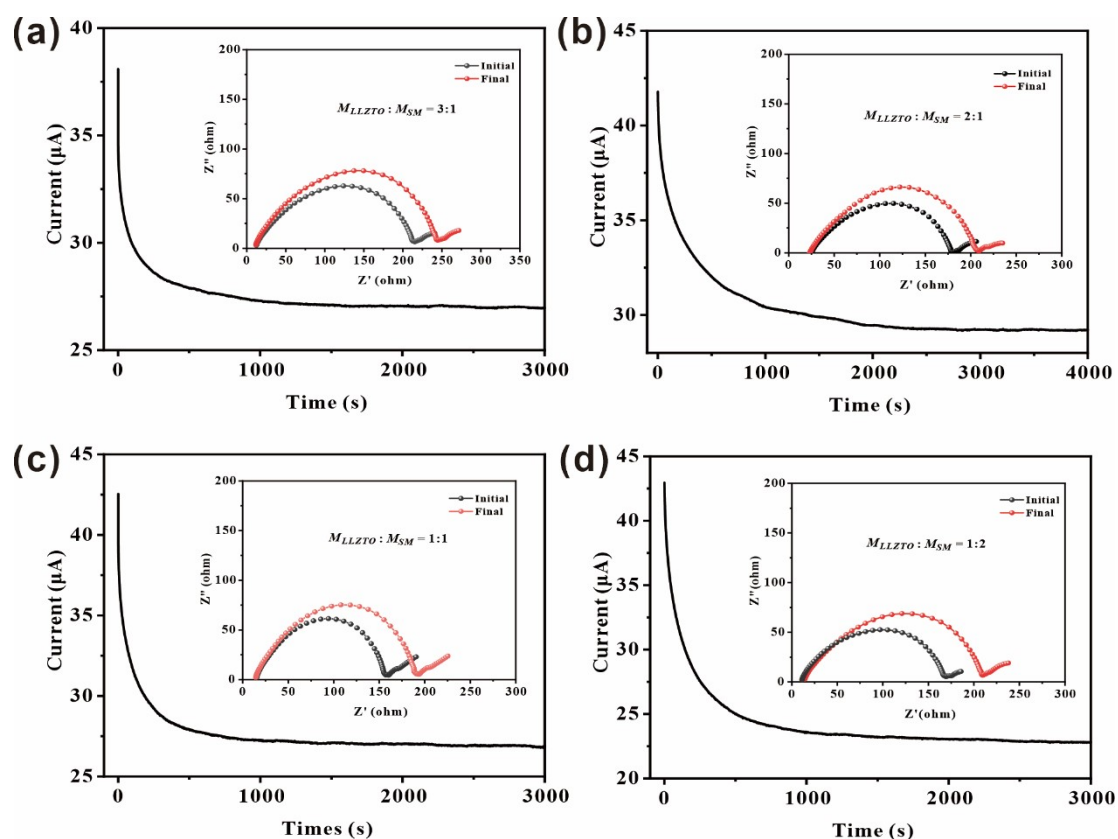

**Fig. S5.** Chronoamperometric curves and EIS Nyquist plots of PCEs prepared in different  $M_{LLZTO}$  to  $M_{SM}$  mass ratios at 60 °C: (a)  $M_{LLZTO} : M_{SM} = 3:1$ ; (b)  $M_{LLZTO} : M_{SM} = 2:1$ ; (c)  $M_{LLZTO} : M_{SM} = 1:1$ ; (d)  $M_{LLZTO} : M_{SM} = 1:2$ .

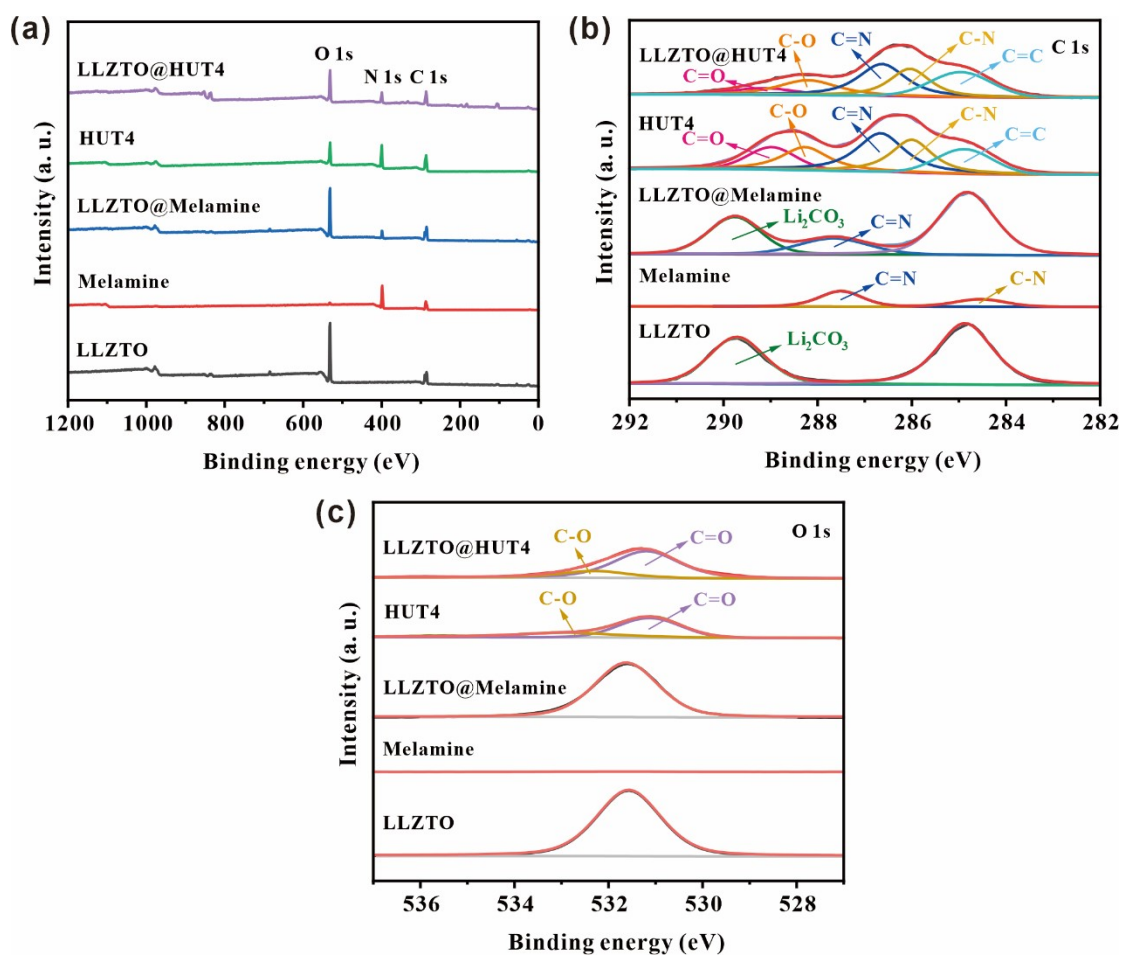

**Fig. S6.** (a) XPS survey, (b) C 1s and (c) O 1s spectra of air-exposed LLZTO, Melamine, LLZTO@Melamine, HUT4 and LLZTO@HUT4 nanoparticles.

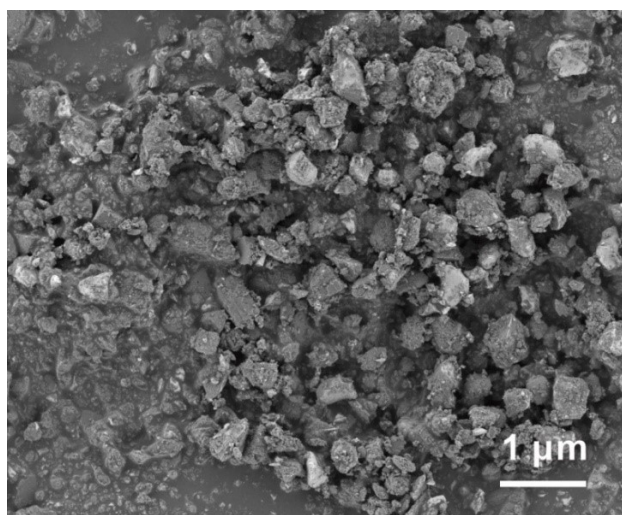

**Fig. S7.** SEM images of LLZTO@HUT4 nanoparticles.

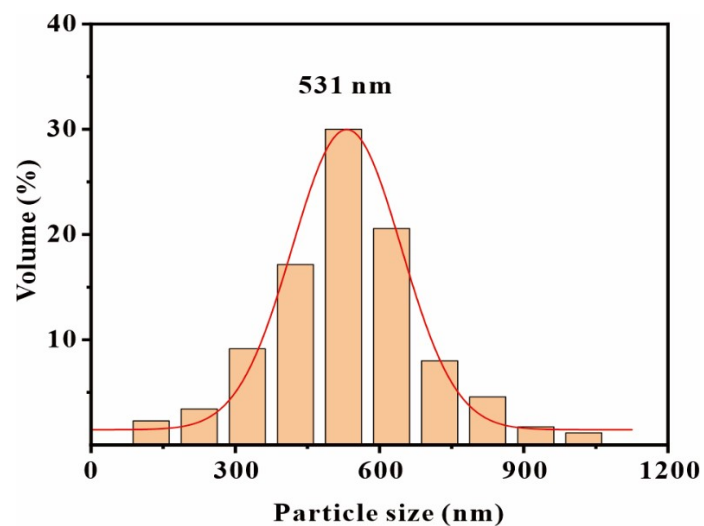

**Fig. S8.** Particles size distribution of the LLZTO powders.

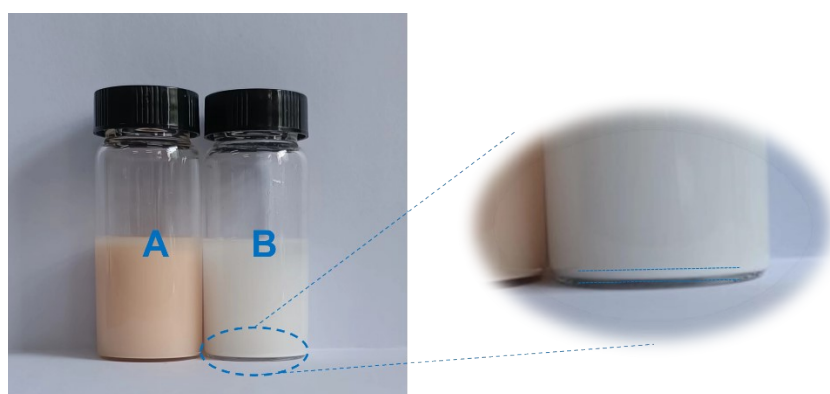

**Fig. S9.** Sedimentation experiment in PEO solvent. A is LLZTO@HUT4 and B is air-exposed LLZTO.

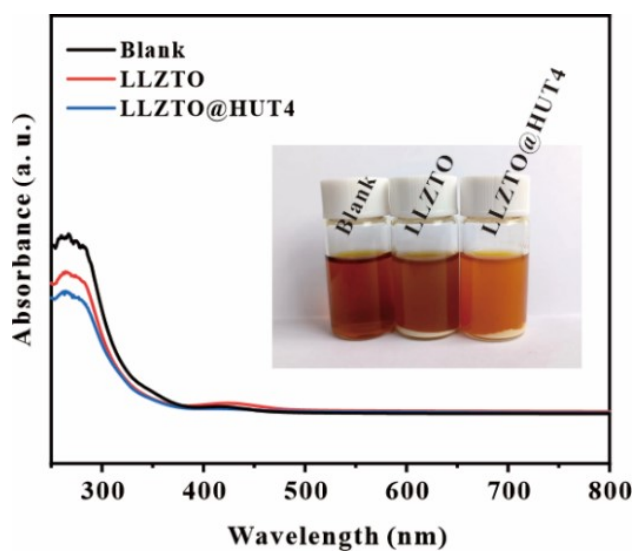

**Fig. S10.** UV-visible absorption spectra of blank, LLZTO, and LLZTO@HUT4 powder soaked in  $\text{Li}_2\text{S}_6$  solution.



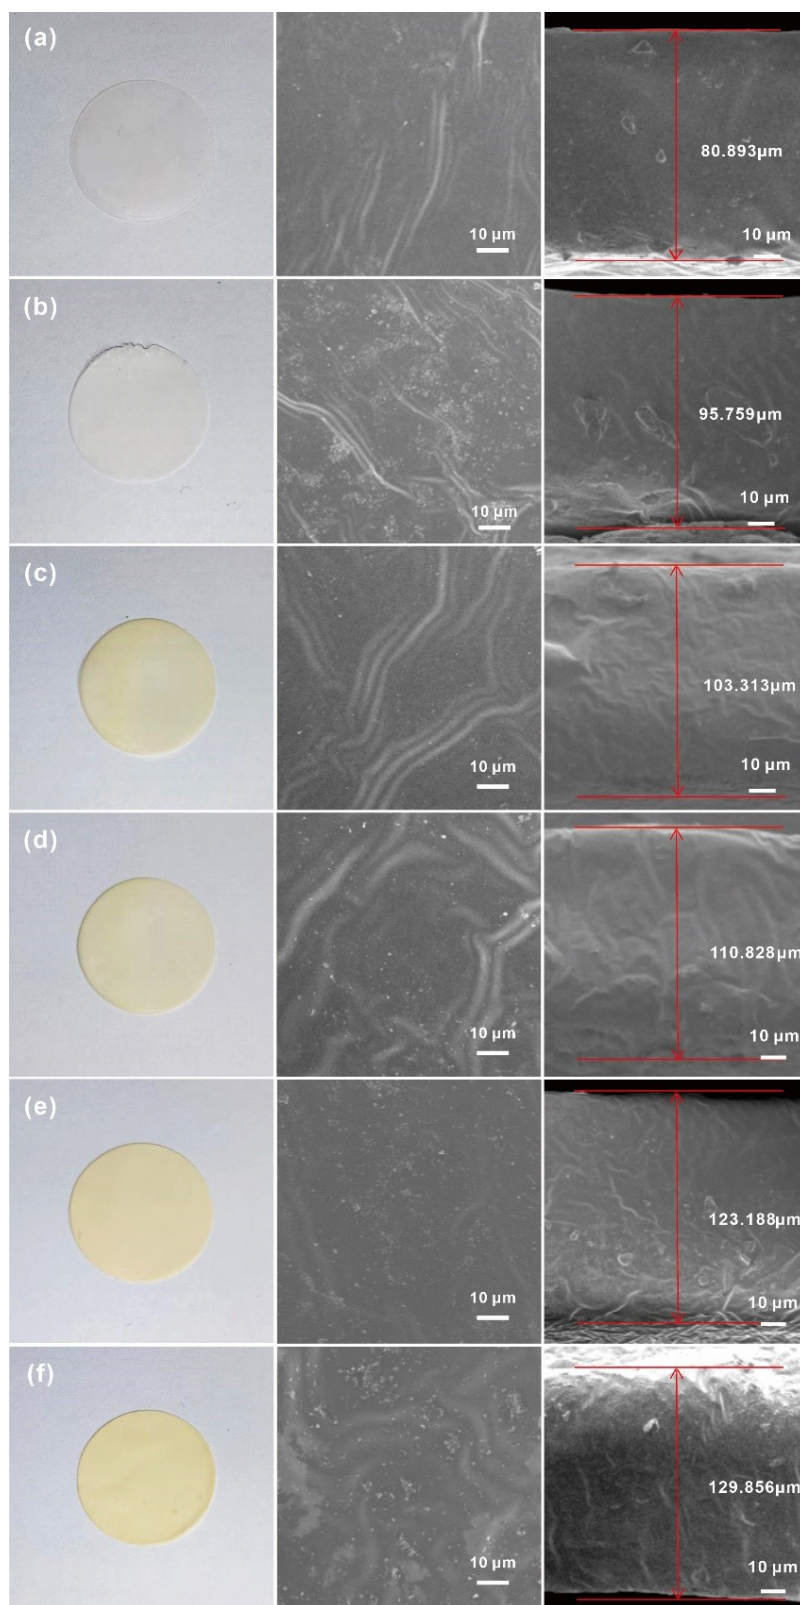

**Fig. S11.** Digital photographs and SEM images on the surface and cross section of synthesized PCEs: (a) PEO; (b) LLZTO-15%/PEO; (c) LLZTO@HUT4-5%/PEO; (d) LLZTO@HUT4-10%/PEO; (e) LLZTO@HUT4-15%/PEO; (f) LLZTO@HUT4-20%/PEO, respectively.



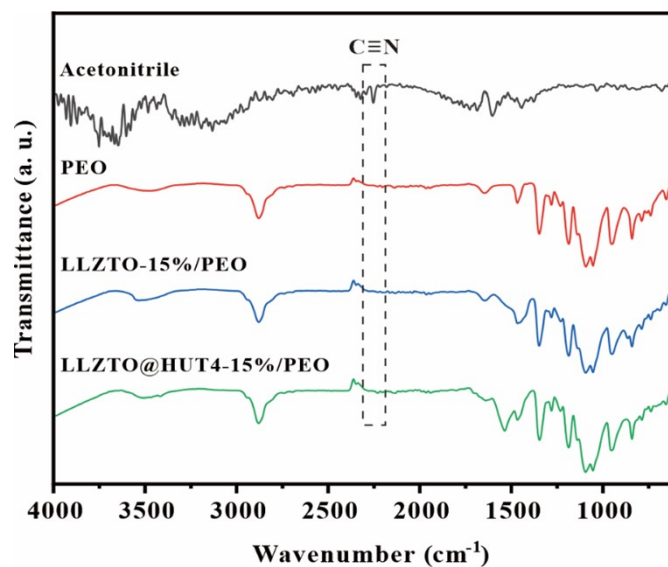

**Fig. S12.** ATR-FTIR spectra of acetonitrile, PEO, LLZTO-15%/PEO and LLZTO@HUT4-15%/PEO.

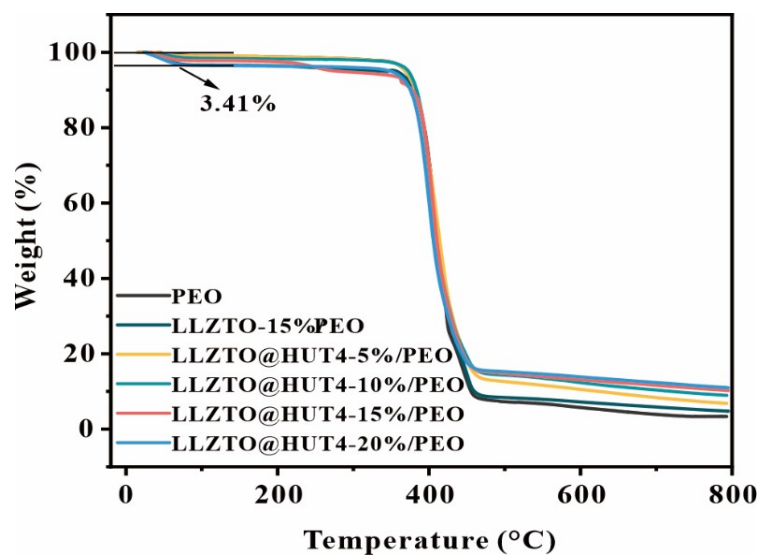

**Fig. S13.** TGA curves of PEO, LLZTO-15%/PEO and LLZTO@HUT4/PEO PCEs.

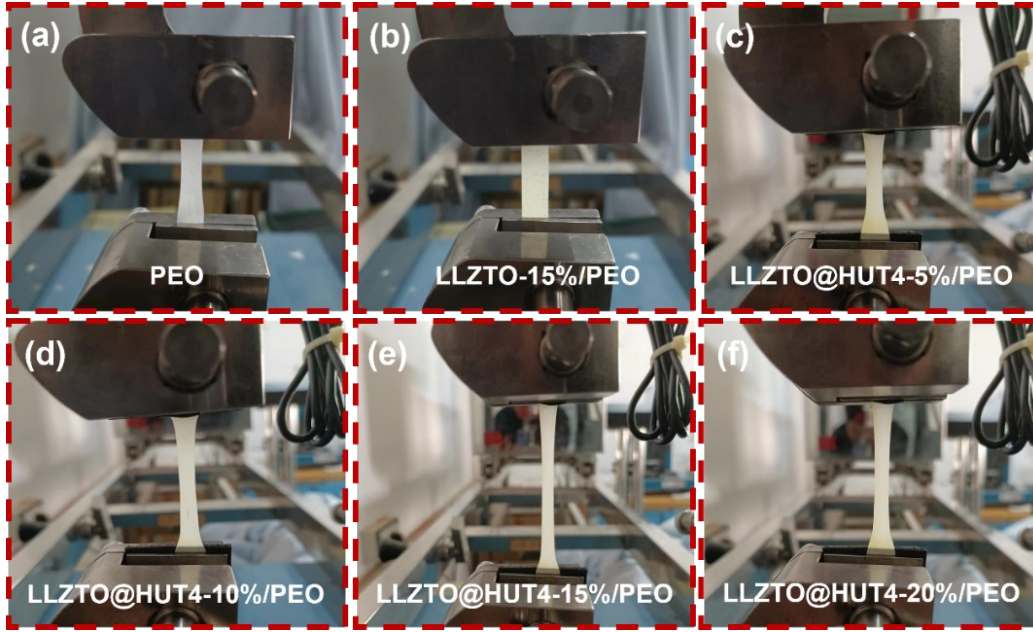

**Fig. S14.** Optical photos of tensile test of (a) PEO; (b) LLZTO-15%/PEO; (c) LLZTO@HUT4-5%/PEO; (d) LLZTO@HUT4-10%/PEO; (e) LLZTO@HUT4-15%/PEO; (f) LLZTO@HUT4-20%/PEO electrolytes.

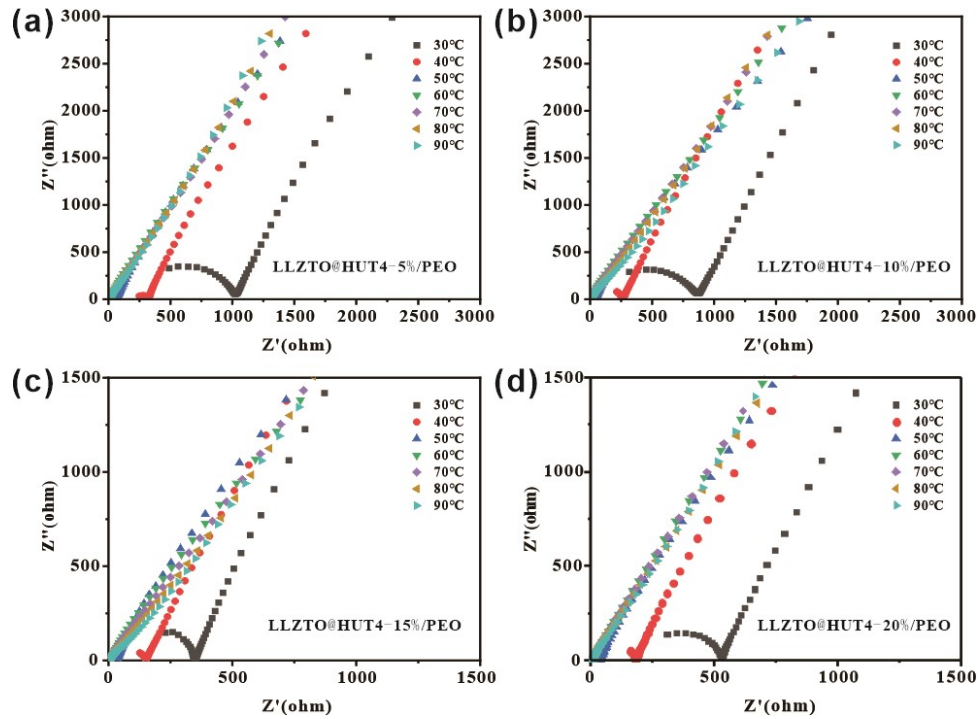

**Fig. S15.** Nyquist plots of LLZTO@HUT4/PEO evaluated in various temperatures (30 °C to 90 °C) with various LLZTO@HUT4 mass ratios: (a) LLZTO@HUT4-5%/PEO; (b) LLZTO@HUT4-10%/PEO; (c) LLZTO@HUT4-15%/PEO; (d) LLZTO@HUT4-20%/PEO.

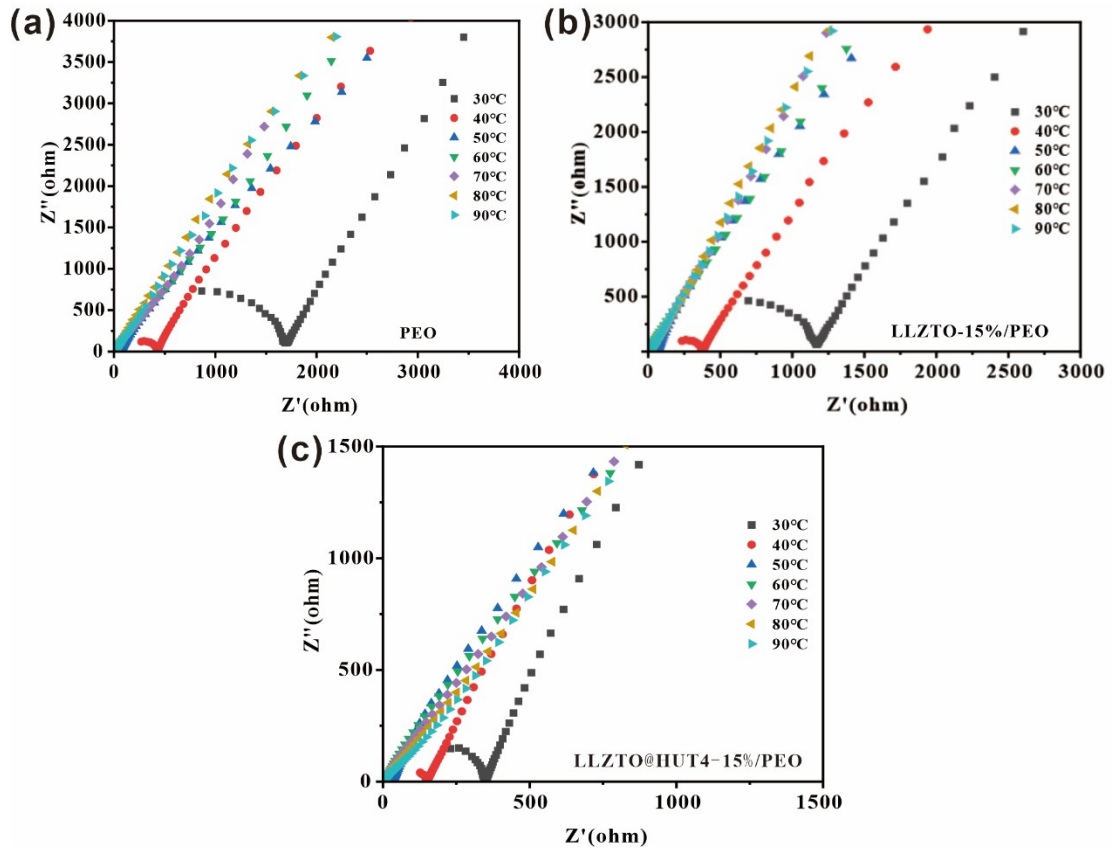

**Fig. S16.** EIS Nyquist plots of as synthesized PCEs evaluated in various temperatures (30 °C to 90 °C): (a) PEO; (b) LLZTO-15%/PEO; (c) LLZTO@HUT4-15%/PEO.

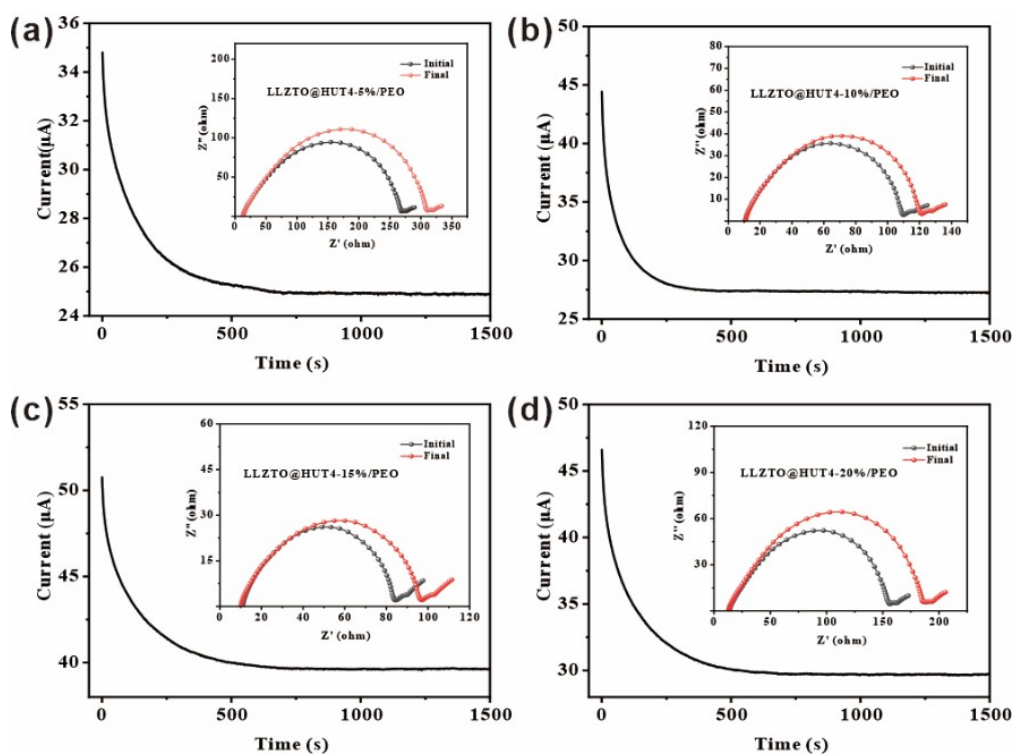

**Fig. S17.** Chronoamperometric curves and EIS Nyquist plots of (a) LLZTO@HUT4-5%/PEO; (b) LLZTO@HUT4-10%/PEO; (c) LLZTO@HUT4-15%/PEO; (d) LLZTO@HUT4-20%/PEO electrolytes at 60 °C.

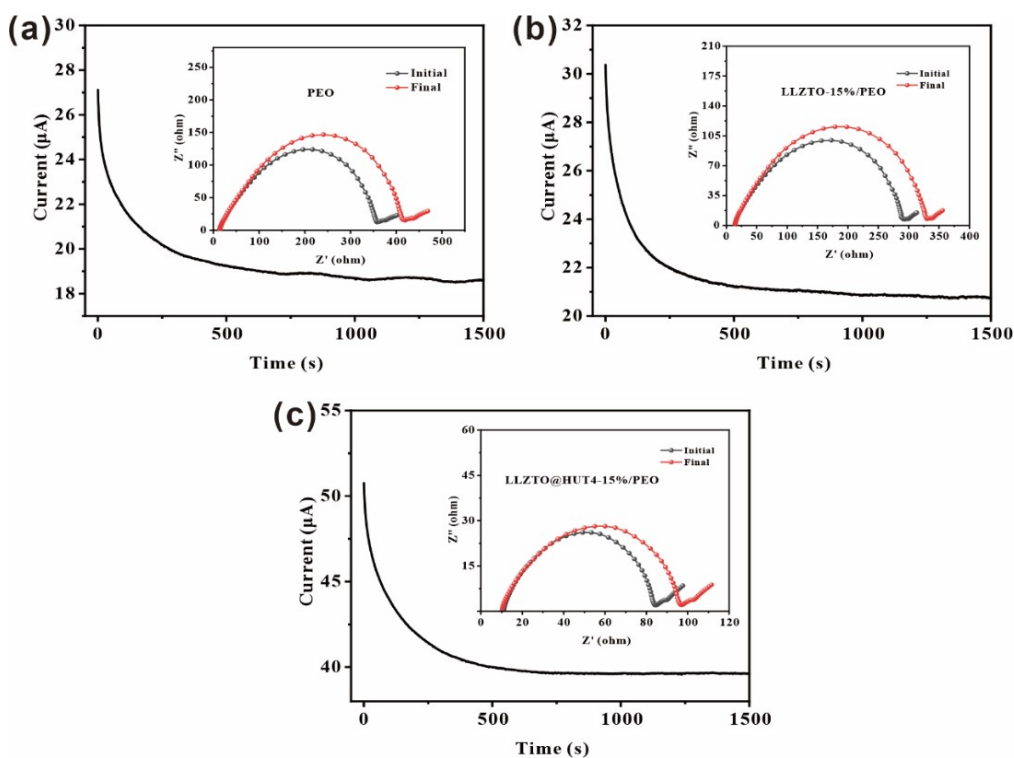

**Fig. S18.** Chronoamperometric curves and Nyquist plots of as synthesized PCEs at 60 °C: (a) PEO; (b) LLZTO-15%/PEO; (c) LLZTO@HUT4-15%/PEO.

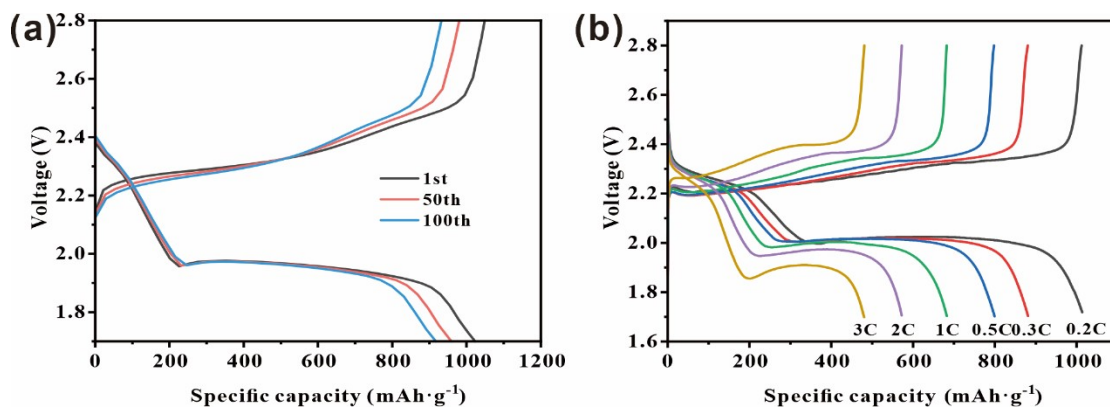

**Fig. S19.** (a) Discharge-charge profiles at 0.2 C for S@CNT|LLZTO@HUT4-15%/PEO|Li; (b) Discharge-charge curves of S@CNT|LLZTO@HUT4-15%/PEO|Li at 60 °C in different rates.

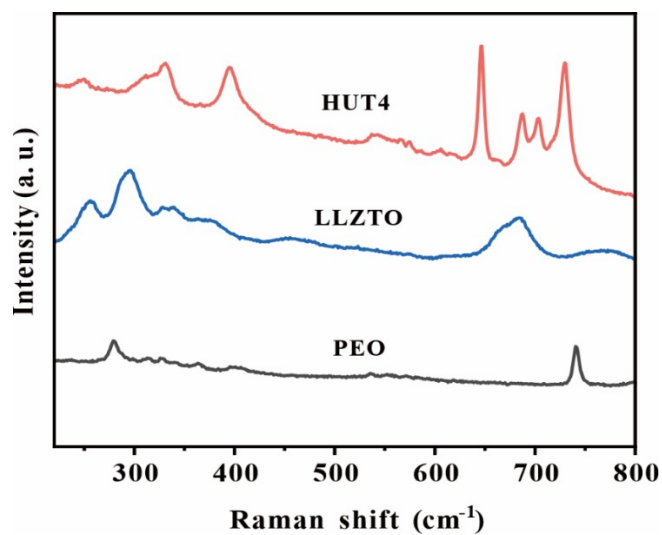

**Fig. S20.** Raman spectra of HUT4, LLZTO and PEO membrane.

**Table S1.** ICP-OES analysis results of LLZTO containing the weight and atomic ratios of metal element: Li, La, Zr and Ta

| Metal elements | Weight ratio (%) | Atomic ratio (%) |
|----------------|------------------|------------------|
| Li             | 6.35             | 56.07            |
| La             | 58.74            | 25.92            |
| Zr             | 18.63            | 12.50            |
| Ta             | 16.28            | 5.51             |

**Table S2.**  $\text{Li}^+$  ions transference number of PCEs prepared with LLZTO@HUT4 nanoparticles in various mass ratios of  $M_{LLZTO}$  to  $M_{SM}$  at 60 °C.

|                           | $I_0/\mu\text{A}$ | $I_S/\mu\text{A}$ | $R_0/\Omega$ | $R_S/\Omega$ | $\Delta V/\text{mV}$ | $t_{\text{Li}^+}$ |
|---------------------------|-------------------|-------------------|--------------|--------------|----------------------|-------------------|
| $M_{LLZTO}: M_{SM} = 3:1$ | 38.09             | 26.86             | 202.44       | 232.71       | 10                   | 0.43              |
| $M_{LLZTO}: M_{SM} = 2:1$ | 41.78             | 28.90             | 157.60       | 185.56       | 10                   | 0.51              |
| $M_{LLZTO}: M_{SM} = 1:1$ | 42.54             | 27.11             | 155.38       | 179.09       | 10                   | 0.42              |
| $M_{LLZTO}: M_{SM} = 1:2$ | 42.96             | 22.80             | 157.81       | 195.03       | 10                   | 0.31              |



**Table S3.** DSC data of as synthesized PCEs

|                    | $T_m/ ^\circ\text{C}$ | $\Delta H_m/ \text{J g}^{-1}$ | $\chi_c/ \%$ |
|--------------------|-----------------------|-------------------------------|--------------|
| PEO                | 57.05                 | 65.80                         | 44.67        |
| LLZTO-15%/PEO      | 55.68                 | 53.47                         | 38.89        |
| LLZTO@HUT4-5%/PEO  | 55.22                 | 52.26                         | 35.39        |
| LLZTO@HUT4-10%/PEO | 54.47                 | 40.86                         | 29.65        |
| LLZTO@HUT4-15%/PEO | 54.02                 | 32.18                         | 24.17        |
| LLZTO@HUT4-20%/PEO | 53.09                 | 30.06                         | 23.34        |

**Table S4.** Data of mechanical properties of PCEs

|                    | Tensile strength/ MPa | Percentage of breaking elongation/ % |
|--------------------|-----------------------|--------------------------------------|
| PEO                | 1.37                  | 1753.44                              |
| LLZTO -15%/PEO     | 1.32                  | 1095.01                              |
| LLZTO@HUT4-5%/PEO  | 1.34                  | 1543.00                              |
| LLZTO@HUT4-10%/PEO | 1.70                  | 2149.55                              |
| LLZTO@HUT4-15%/PEO | 2.40                  | 2152.99                              |
| LLZTO@HUT4-20%/PEO | 2.25                  | 2084.30                              |

**Table S5.** Ionic conductivity of PCEs with different ratios of LLZTO@HUT4 from 30 to 90 °C (Each ratio of the samples were tested 3 times and the average value was calculated, Unit: mS cm<sup>-1</sup>).

|                        | 30 °C   | 40 °C   | 50 °C   | 60 °C   | 70 °C   | 80 °C   | 90 °C   |
|------------------------|---------|---------|---------|---------|---------|---------|---------|
| LLZTO@HU<br>T4-5%/PEO  | 0.0058  | 0.0059  | 0.016   | 0.28    | 0.68    | 1.20    | 1.79    |
|                        | 0.0049  | 0.0072  | 0.020   | 0.31    | 0.71    | 1.15    | 1.72    |
|                        | 0.0046  | 0.0064  | 0.018   | 0.28    | 0.62    | 1.07    | 1.86    |
|                        | average |
|                        | 0.0051  | 0.016   | 0.086   | 0.29    | 0.67    | 1.14    | 1.79    |
| LLZTO@HU<br>T4-10%/PEO | 0.0073  | 0.022   | 0.13    | 0.55    | 0.93    | 1.59    | 2.11    |
|                        | 0.0064  | 0.019   | 0.16    | 0.49    | 0.98    | 1.52    | 2.01    |
|                        | 0.0058  | 0.025   | 0.13    | 0.55    | 0.97    | 1.48    | 2.15    |
|                        | average |
|                        | 0.0065  | 0.022   | 0.14    | 0.53    | 0.96    | 1.53    | 2.09    |
| LLZTO@HU<br>T4-15%/PEO | 0.018   | 0.049   | 0.19    | 0.75    | 1.42    | 2.03    | 3.06    |
|                        | 0.015   | 0.038   | 0.17    | 0.72    | 1.32    | 1.94    | 3.02    |
|                        | 0.021   | 0.039   | 0.21    | 0.72    | 1.37    | 2.00    | 3.10    |
|                        | average |
|                        | 0.018   | 0.042   | 0.19    | 0.73    | 1.37    | 1.99    | 3.06    |
| LLZTO@HU<br>T4-20%/PEO | 0.010   | 0.039   | 0.15    | 0.40    | 0.80    | 1.14    | 1.71    |
|                        | 0.016   | 0.040   | 0.17    | 0.46    | 0.69    | 1.20    | 1.59    |
|                        | 0.013   | 0.032   | 0.19    | 0.43    | 0.76    | 1.11    | 1.68    |
|                        | average |
|                        | 0.013   | 0.037   | 0.17    | 0.43    | 0.75    | 1.15    | 1.66    |

**Table S6.** Ionic conductivity of as-synthesized PCEs from 30 °C to 90 °C (Each sample was tested 3 times and the average value was calculated, Unit: mS cm<sup>-1</sup>).

|                        | 30 °C   | 40 °C   | 50 °C   | 60 °C   | 70 °C   | 80 °C   | 90 °C   |
|------------------------|---------|---------|---------|---------|---------|---------|---------|
| LLZTO                  | 0.016   | 0.049   | 0.075   | 0.11    | 0.20    | 0.31    | 0.49    |
|                        | 0.017   | 0.045   | 0.081   | 0.14    | 0.23    | 0.30    | 0.52    |
|                        | 0.024   | 0.044   | 0.078   | 0.17    | 0.20    | 0.35    | 0.49    |
|                        | average |
|                        | 0.019   | 0.046   | 0.078   | 0.14    | 0.21    | 0.32    | 0.50    |
| PEO                    | 0.0020  | 0.0097  | 0.053   | 0.34    | 0.57    | 0.63    | 0.98    |
|                        | 0.0024  | 0.010   | 0.062   | 0.35    | 0.61    | 0.72    | 1.11    |
|                        | 0.0028  | 0.0091  | 0.065   | 0.27    | 0.53    | 0.69    | 0.94    |
|                        | average |
|                        | 0.0024  | 0.0096  | 0.060   | 0.32    | 0.57    | 0.68    | 1.01    |
| LLZTO-<br>10%/PEO      | 0.0045  | 0.012   | 0.082   | 0.39    | 0.67    | 0.99    | 1.42    |
|                        | 0.0040  | 0.013   | 0.082   | 0.35    | 0.66    | 0.97    | 1.50    |
|                        | 0.0038  | 0.014   | 0.076   | 0.40    | 0.62    | 1.10    | 1.55    |
|                        | average |
|                        | 0.0041  | 0.013   | 0.080   | 0.38    | 0.65    | 1.02    | 1.49    |
| LLZTO@HUT<br>4-15%/PEO | 0.018   | 0.049   | 0.19    | 0.75    | 1.42    | 2.03    | 3.06    |
|                        | 0.015   | 0.038   | 0.17    | 0.72    | 1.32    | 1.94    | 3.02    |
|                        | 0.021   | 0.039   | 0.21    | 0.72    | 1.37    | 2.00    | 3.10    |
|                        | average |
|                        | 0.018   | 0.042   | 0.19    | 0.73    | 1.37    | 1.99    | 3.06    |

**Table S7.** The electrochemical data is cited in the reported literature of the PEO based electrolytes

| Ref.              | Electrolyte composition                                       | $t_{Li^+}$ | Ionic conductivity/ S cm <sup>-1</sup> |
|-------------------|---------------------------------------------------------------|------------|----------------------------------------|
| <b>This study</b> | LLZTO@HUT4-15%/PEO                                            | 0.74       | $7.33 \times 10^{-4}$ (60 °C)          |
| 1                 | PEO/LiTFSI                                                    | 0.21       | $3.4 \times 10^{-6}$ (25 °C)           |
| 2                 | PEO/LiTFSI/HUT4                                               | 0.62       | $5.3 \times 10^{-4}$ (90 °C)           |
| 3                 | PEO-10%iCP@TFSI                                               | 0.284      | $1.2 \times 10^{-3}$ (80 °C)           |
| 4                 | LiTFSI/PEO-IL@ZrO <sub>2</sub>                                | /          | $4.95 \times 10^{-4}$ (50 °C)          |
| 5                 | PEO/LiTFSI/Al <sub>2</sub> O <sub>3</sub>                     | 0.43       | $5.4 \times 10^{-4}$ (60 °C)           |
| 6                 | PVDF-HFP/LiAlO <sub>2</sub> @g-Al <sub>2</sub> O <sub>3</sub> | 0.92       | $8.5 \times 10^{-4}$ (25 °C)           |
| 7                 | PEO/LiClO <sub>4</sub> /TiO <sub>2</sub>                      | /          | $5.308 \times 10^{-5}$ (20 °C)         |
| 8                 | PEO/LiTFSI-15%LLZO                                            | /          | $1.1 \times 10^{-4}$ (40 °C)           |
| 9                 | PEO/EO@LLZTO                                                  | 0.72       | $1.91 \times 10^{-4}$ (60 °C)          |
| 10                | PEO/LLZTO@CD-TFSI                                             | 0.48       | $8.7 \times 10^{-4}$ (60 °C)           |
| 11                | PEO/PVDF/LLZTO                                                | 0.3        | $9.3 \times 10^{-4}$ (50 °C)           |
| 12                | PEO/LLZTO@SA                                                  | /          | $8.3 \times 10^{-4}$ (70 °C)           |
| 13                | PEO/PPO@LLZTO                                                 | 0.33       | $2.43 \times 10^{-5}$ (60 °C)          |
| 14                | PEO(10)/LLZTO(85)/PEG(5<br>)                                  | /          | $5.24 \times 10^{-4}$ (80 °C)          |
| 15                | PEO/LiTFSI/LLZTO(50vol)                                       | < 0.47     | $3.2 \times 10^{-5}$ (30 °C)           |
| 16                | PEO/G4/LiTFSI/LLZO                                            | > 0.5      | $> 1 \times 10^{-4}$ (20 °C)           |
| 17                | PVCA-KH570/LLZO                                               | 0.752      | $3.39 \times 10^{-4}$ (25 °C)          |

1. H. Y. Huo, X. N. Li, Y. P. Sun, X. T. Lin, K. D. Davis, J. W. Liang, X. J. Gao, R. Y. Li, H. Huang, X. X. Guo, X. L. Sun, *Nano Energy*, 2020, **73**, 104836.
2. Y. Wang, S. Geng, G. Yan, X. Liu, X. Zhang, Y. Feng, J. Shi, X. Qu, *ACS Appl. Energy Mater.*, 2022, **5**, 2495-2504.

3. Y. Wang, H. Ji, X. Zhang, J. Shi, X. Li, X. Jiang, X. Qu, *ACS Appl. Mater. Interfaces*, 2021, **13**, 16469-16477.
4. O. Sheng, C. Jin, J. Luo, H. Yuan, C. Fang, H. Huang, Y. Gan, J. Zhang, Y. Xia, C. Liang, W. Zhang, X. Tao, *J. Mater. Chem. A*, 2017, **5**, 12934-12942.
5. Y. Y. Shi, Z. J. Fan, B. Ding, Z. W. Li, Q. Y. Lin, S. Chen, H. Dou, X. J. Zhang, *J. Electroanal. Chem.*, 2021, **881**, 114916.
6. X. Zhou, X. Li, Z. Li, H. Xie, J. Fu, L. Wei, H. Yang and X. Guo, *J. Mater. Chem. A*, 2021, **9**, 18239-18246.
7. J. W. Zha, N. Huang, K. Q. He, Z. M. Dang, C. Y. Shi, R. K. Li, *High Volt.*, 2017, **2**, 25-31.
8. X. Tao, Y. Liu, W. Liu, G. Zhou, J. Zhao, D. Lin, C. Zu, O. Sheng, W. Zhang, H. W. Lee, Y. Cui, *Nano Lett.*, 2017, **17**, 2967-2972.
9. X. Ma, M. Liu, Q. P. Wu, X. Guan, F. Wang, H. M. Liu, J. Xu, *ACS Appl. Mater. Interfaces*, 2022, **14**, 53828-53839.
10. Z. Lu, L. Peng, Y. Rong, E. Wang, R. Shi, H. Yang, Y. Xu, R. Yang, J. Chao, *Energy Environ. Mater.*, 2022, e12498.
11. L. Gao, J. X. Li, J. G. Ju, B. W. Cheng, W. M. Kang, N. P. Deng, *Compos. Sci. Technol.*, 2020, **200**, 108408.
12. R. A. Tong, L. H. Chen, G. Shao, H. L. Wang, C. A. Wang, *J. Power Sources*, 2021, 229672.
13. Q. Zhang, K. Liu, K. Liu, J. P. Li, C. J. Ma, L. Zhou, Y. P. Du, *J. Colloid Interface Sci.*, 2020, **580**, 389-398.
14. L. Chen, Y. T. Li, S. P. Li, L. Z. Fan, C. W. Nan, J. B. Goodenough, *Nano Energy*, 2018, **46**, 176-184.
15. H. Y. Huo, Y. Chen, J. Luo, X. F. Yang, X. X. Guo, X. L. Sun, *Adv. Energy. Mater.*, 2019, **9**, 1804004.
16. M. Falco, L. Castro, J.R. Nair, F. Bella, F. Barde, G. Meligrana, C. Gerbaldi, *ACS. Appl. Energy Mater.*, 2019, **2**, 1600-1607.
17. J. Chai, B. Chen, F. Xian, P. Wang, H. Du, J. Zhang, Z. Liu, H. Zhang, S. Dong, X. Zhou, G.L. Cui, *Small*, 2018, **14**, 1802244.
